# Supplementary material for: Host development overwhelms environmental dispersal in governing the ecological succession of zebrafish gut microbiota
Source: PubMed Central journal article supplement (PMC7815754; doi:10.1038/s41522-020-00176-2), 2021-01-19
Supplement: 41522_2020_176_MOESM1_ESM.pdf [file 41522_2020_176_MOESM1_ESM.pdf]

## Supplementary information

### Host development overwhelms environmental dispersal in governing the ecological succession of zebrafish gut microbiota

Fanshu Xiao<sup>1,9</sup>, Wengen Zhu<sup>2,9</sup>, Yuhe Yu<sup>2</sup>, Zhili He<sup>1,3</sup>, Bo Wu<sup>1</sup>, Cheng Wang<sup>1</sup>, Longfei Shu<sup>1</sup>, Xinghao Li<sup>2</sup>, Huaqun Yin<sup>4</sup>, Jianjun Wang<sup>5</sup>, Philippe Juneau<sup>6</sup>, Xiafei Zheng<sup>1</sup>, Yongjie Wu<sup>1</sup>, Juan Li<sup>3</sup>, Xiaojuan Chen<sup>7</sup>, Dongwei Hou<sup>1</sup>, Zhijian Huang<sup>1</sup>, Jianguo He<sup>1</sup>, Guohuan Xu<sup>8</sup>, Liwei Xie<sup>8</sup>, Jie Huang<sup>2</sup>✉ and Qingyun Yan<sup>1</sup>✉

<sup>1</sup>Environmental Microbiomics Research Center, School of Environmental Science and Engineering, Southern Marine Science and Engineering Guangdong Laboratory (Zhuhai), Sun Yat-sen University, Guangzhou 510006, China. <sup>2</sup>Key Laboratory of Aquatic Biodiversity and Conservation of Chinese Academy of Sciences, Institute of Hydrobiology, Chinese Academy of Sciences, Wuhan 430072, China. <sup>3</sup>College of Agronomy, Hunan Agricultural University, Changsha 410128, China. <sup>4</sup>Key Laboratory of Biometallurgy of Ministry of Education, School of Minerals Processing and Bioengineering, Central South University, Changsha 410083, China. <sup>5</sup>State Key Laboratory of Lake Science and Environment, Nanjing Institute of Geography and Limnology, Chinese Academy of Sciences, Nanjing 210008, China. <sup>6</sup>Department of Biological Science, GRIL, TOXEN, Ecotoxicology of Aquatic Microorganisms Laboratory, Université du Québec à Montréal, Succursale Centre-Ville, Montréal, Québec, Canada. <sup>7</sup>Key Laboratory of Ecological Impacts of Hydraulic-Projects and Restoration of Aquatic Ecosystem of Ministry of Water Resources, Institute of Hydroecology, Ministry of Water Resources and Chinese Academy of Sciences, Wuhan 430079, China. <sup>8</sup>State Key Laboratory of Applied Microbiology Southern China, Guangdong Institute of Microbiology, Guangdong Academy of Sciences, Guangzhou 510070, China. <sup>9</sup>These authors contributed equally: Fanshu Xiao, Wengen Zhu. ✉email: yanqy6@mail.sysu.edu.cn; jhuang@ihb.ac.cn

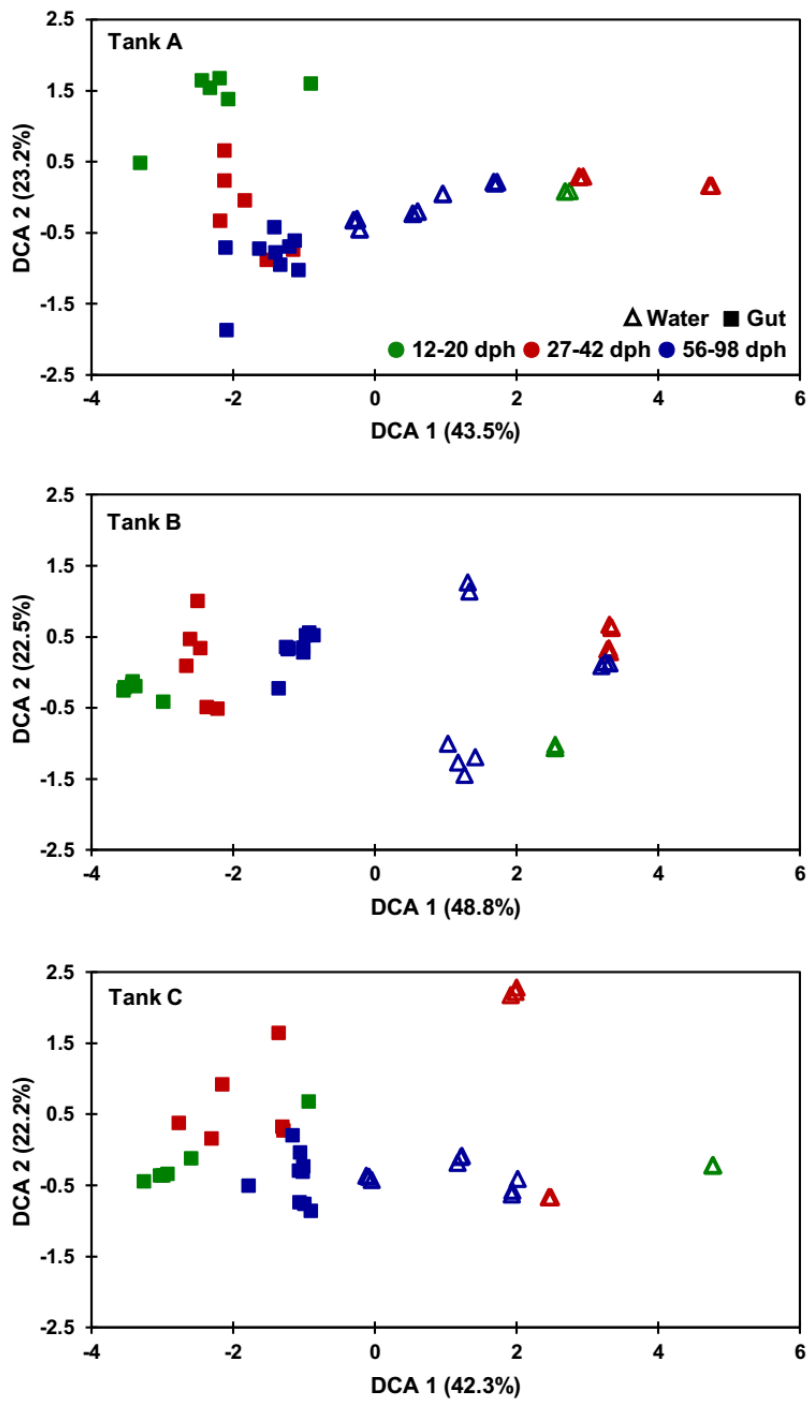

**Supplementary Fig. 1** Detrended correspondence analysis (DCA) showing the dissimilarities of gut microbiotas and water microbiotas within each tank across zebrafish development. Zebrafish were raised in original environments. No water sample is available for 20-day post-hatching (dph).

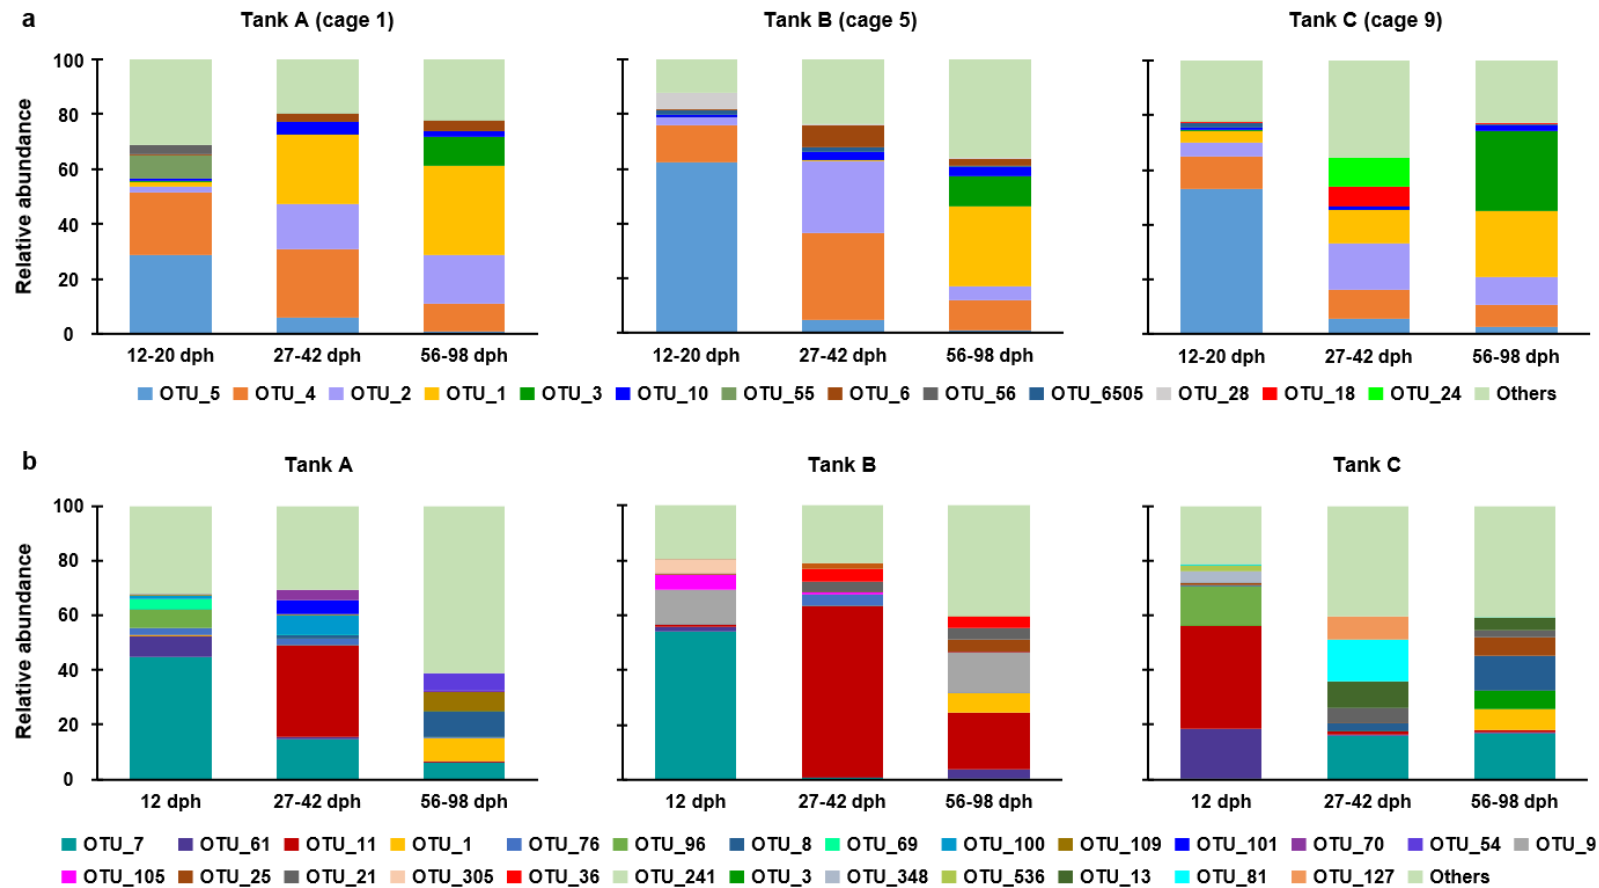

**Supplementary Fig. 2** Comparison of relative abundances of the top 5 OTUs varies across zebrafish development within each tank. **a** gut microbiotas in zebrafish reared in original environments. In each tank, the top 5 OTUs detected in any stage were plotted throughout all stages to make sure the OTUs presented in different stages is consistent. Only the mean values of samples collected from each stage are plotted. dph: day post-hatching. **b** water microbiotas. OTU\_1 and OTU\_3: *Cetobacterium*; OTU\_2: *Plesiomonas*; OTU\_5 and OTU\_6505: *Vibrio*; OTU\_7, OTU\_11 and OTU\_81: *Flavobacterium*; OTU\_8: *Clavibacter*; OTU\_18: *Citrobacter*; OTU\_21, OTU\_109, and OTU\_70: *Limnohabitans*; OTU\_25: *Mycobacterium*; OTU\_28: *Shewanella*; OTU\_36: *Sediminibacterium*; OTU\_54: *Cloacibacterium*; OTU\_55: *Acinetobacter*; OTU\_56: *Anaerospira*; OTU\_61: *Rhodoferrax*; OTU\_76: *Acidovorax*; OTU\_96: *Armatimonas*; OTU\_105: *Polynucleobacter*; OTU\_241: *Candidatus Rhodoluna*; OTU\_536: *Phenylobacterium*; other OTUs: unclassified at the genus level.

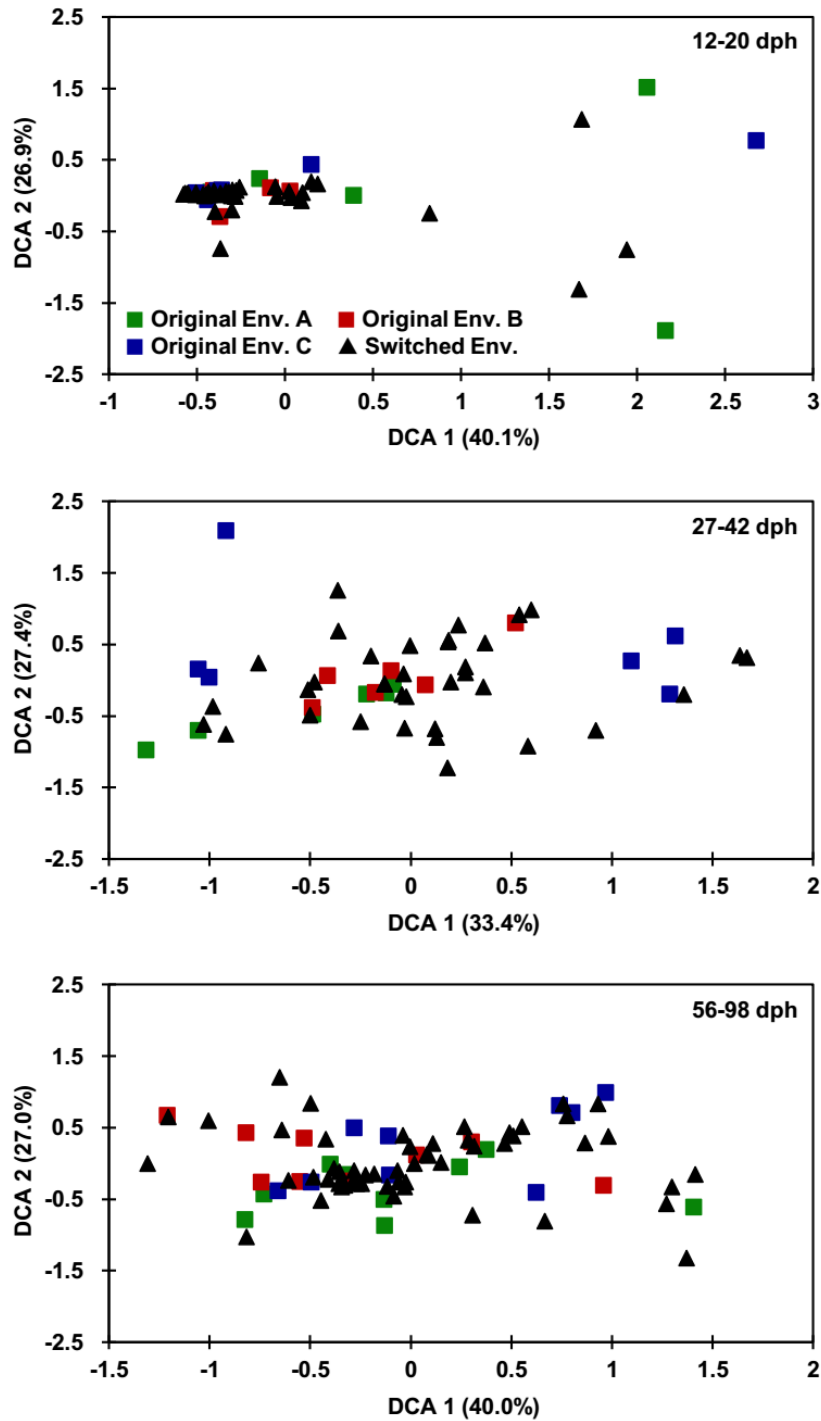

**Supplementary Fig. 3** Detrended correspondence analysis (DCA) showing the dissimilarities of gut microbiota of zebrafish raised in original environments (Env.) and switched environments according to developmental stages. dph: day post-hatching.

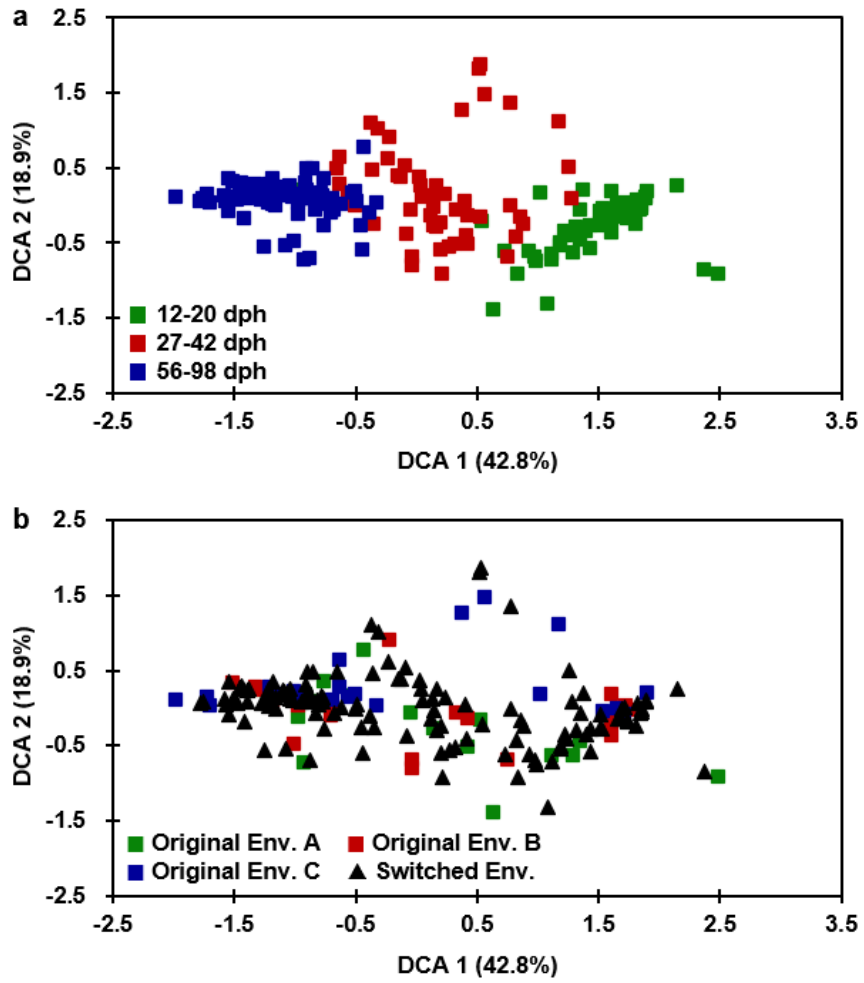

**Supplementary Fig. 4** Detrended correspondence analysis (DCA) showing the dissimilarities of gut microbiota in zebrafish. **a** according to developmental stages. **b** according to environments (Env.). dph: day post-hatching.

**Supplementary Table 1.** Taxonomy and classification of OTUs showed in Fig. 3 or Supplementary Fig. 2.

| OTU ID | Phylum         | Class               | Order             | Family                 | Genus                   |
|--------|----------------|---------------------|-------------------|------------------------|-------------------------|
| OTU_1  | Fusobacteria   | Fusobacteriia       | Fusobacteriales   | Fusobacteriaceae       | <i>Cetobacterium</i>    |
| OTU_2  | Proteobacteria | Gammaproteobacteria | Enterobacteriales | Enterobacteriaceae     | <i>Plesiomonas</i>      |
| OTU_3  | Fusobacteria   | Fusobacteriia       | Fusobacteriales   | Fusobacteriaceae       | <i>Cetobacterium</i>    |
| OTU_4  | Proteobacteria | Gammaproteobacteria | Aeromonadales     | Aeromonadaceae         | Unclassified            |
| OTU_5  | Proteobacteria | Gammaproteobacteria | Vibrionales       | Pseudoalteromonadaceae | <i>Vibrio</i>           |
| OTU_6  | Proteobacteria | Gammaproteobacteria | Vibrionales       | Pseudoalteromonadaceae | Unclassified            |
| OTU_7  | Bacteroidetes  | Flavobacteriia      | Flavobacteriales  | Flavobacteriaceae      | <i>Flavobacterium</i>   |
| OTU_8  | Actinobacteria | Actinobacteria      | Actinomycetales   | Microbacteriaceae      | <i>Clavibacter</i>      |
| OTU_9  | Proteobacteria | Alphaproteobacteria | Rhizobiales       | Unclassified           | Unclassified            |
| OTU_10 | Proteobacteria | Gammaproteobacteria | Aeromonadales     | Aeromonadaceae         | Unclassified            |
| OTU_11 | Bacteroidetes  | Flavobacteriia      | Flavobacteriales  | Flavobacteriaceae      | <i>Flavobacterium</i>   |
| OTU_13 | Actinobacteria | Actinobacteria      | Actinomycetales   | ACK-M1                 | Unclassified            |
| OTU_15 | Proteobacteria | Gammaproteobacteria | Vibrionales       | Vibrionaceae           | <i>Vibrio</i>           |
| OTU_16 | Bacteroidetes  | Saprospirae         | Saprospirales     | Chitinophagaceae       | <i>Flaviumibacter</i>   |
| OTU_18 | Proteobacteria | Gammaproteobacteria | Enterobacteriales | Enterobacteriaceae     | <i>Citrobacter</i>      |
| OTU_19 | Proteobacteria | Betaproteobacteria  | Burkholderiales   | Oxalobacteraceae       | <i>Polynucleobacter</i> |
| OTU_20 | TM6            | SJA-4               | Unclassified      | Unclassified           | Unclassified            |
| OTU_21 | Proteobacteria | Betaproteobacteria  | Burkholderiales   | Comamonadaceae         | <i>Limnohabitans</i>    |
| OTU_22 | Firmicutes     | Clostridia          | Clostridiales     | Peptostreptococcaceae  | Unclassified            |
| OTU_23 | Proteobacteria | Gammaproteobacteria | Alteromonadales   | Shewanellaceae         | <i>Shewanella</i>       |
| OTU_24 | Proteobacteria | Alphaproteobacteria | Rickettsiales     | mitochondria           | Unclassified            |
| OTU_25 | Actinobacteria | Actinobacteria      | Actinomycetales   | Mycobacteriaceae       | <i>Mycobacterium</i>    |
| OTU_26 | Proteobacteria | Gammaproteobacteria | Vibrionales       | Pseudoalteromonadaceae | Unclassified            |
| OTU_27 | Proteobacteria | Gammaproteobacteria | Vibrionales       | Pseudoalteromonadaceae | Unclassified            |
| OTU_28 | Proteobacteria | Gammaproteobacteria | Alteromonadales   | Shewanellaceae         | <i>Shewanella</i>       |

| OTU ID  | Phylum          | Class               | Order              | Family             | Genus                    |
|---------|-----------------|---------------------|--------------------|--------------------|--------------------------|
| OTU_29  | Tenericutes     | CK-1C4-19           | Unclassified       | Unclassified       | Unclassified             |
| OTU_30  | Proteobacteria  | Gammaproteobacteria | Alteromonadales    | Shewanellaceae     | <i>Shewanella</i>        |
| OTU_32  | Proteobacteria  | Gammaproteobacteria | Xanthomonadales    | Xanthomonadaceae   | Unclassified             |
| OTU_36  | Bacteroidetes   | Saprospirae         | Saprospirales      | Chitinophagaceae   | <i>Sediminibacterium</i> |
| OTU_41  | Proteobacteria  | Alphaproteobacteria | Rhodobacterales    | Rhodobacteraceae   | Unclassified             |
| OTU_42  | Proteobacteria  | Gammaproteobacteria | Pseudomonadales    | Pseudomonadaceae   | <i>Pseudomonas</i>       |
| OTU_53  | Proteobacteria  | Gammaproteobacteria | Alteromonadales    | OM60               | Unclassified             |
| OTU_54  | Bacteroidetes   | Flavobacteriia      | Flavobacteriales   | Weeksellaceae      | <i>Cloacibacterium</i>   |
| OTU_55  | Proteobacteria  | Gammaproteobacteria | Pseudomonadales    | Moraxellaceae      | <i>Acinetobacter</i>     |
| OTU_56  | Proteobacteria  | Alphaproteobacteria | Rhodobacterales    | Rhodobacteraceae   | <i>Anaerospira</i>       |
| OTU_61  | Proteobacteria  | Betaproteobacteria  | Burkholderiales    | Comamonadaceae     | <i>Rhodoferax</i>        |
| OTU_69  | Actinobacteria  | Actinobacteria      | Actinomycetales    | ACK-M1             | Unclassified             |
| OTU_70  | Proteobacteria  | Betaproteobacteria  | Burkholderiales    | Comamonadaceae     | <i>Limnohabitans</i>     |
| OTU_76  | Proteobacteria  | Betaproteobacteria  | Burkholderiales    | Comamonadaceae     | <i>Acidovorax</i>        |
| OTU_77  | Proteobacteria  | Gammaproteobacteria | Enterobacteriales  | Enterobacteriaceae | Unclassified             |
| OTU_78  | Proteobacteria  | Alphaproteobacteria | Rickettsiales      | Unclassified       | Unclassified             |
| OTU_79  | Bacteroidetes   | Flavobacteriia      | Flavobacteriales   | Weeksellaceae      | <i>Wautersiella</i>      |
| OTU_80  | Proteobacteria  | Gammaproteobacteria | Enterobacteriales  | Enterobacteriaceae | <i>Klebsiella</i>        |
| OTU_81  | Bacteroidetes   | Flavobacteriia      | Flavobacteriales   | Flavobacteriaceae  | <i>Flavobacterium</i>    |
| OTU_85  | Proteobacteria  | Betaproteobacteria  | Burkholderiales    | Comamonadaceae     | Unclassified             |
| OTU_91  | Bacteroidetes   | Saprospirae         | Saprospirales      | Chitinophagaceae   | <i>Sediminibacterium</i> |
| OTU_96  | Armatimonadetes | Armatimonadia       | Armatimonadales    | Armatimonadaceae   | <i>Armatimonas</i>       |
| OTU_100 | Bacteroidetes   | Cytophagia          | Cytophagales       | Cytophagaceae      | Unclassified             |
| OTU_101 | Bacteroidetes   | Sphingobacteriia    | Sphingobacteriales | Unclassified       | Unclassified             |
| OTU_105 | Proteobacteria  | Betaproteobacteria  | Burkholderiales    | Oxalobacteraceae   | <i>Polynucleobacter</i>  |
| OTU_109 | Proteobacteria  | Betaproteobacteria  | Burkholderiales    | Comamonadaceae     | <i>Limnohabitans</i>     |
| OTU_117 | Proteobacteria  | Alphaproteobacteria | Rhizobiales        | Rhizobiaceae       | Unclassified             |

| OTU ID  | Phylum          | Class               | Order              | Family              | Genus                       |
|---------|-----------------|---------------------|--------------------|---------------------|-----------------------------|
| OTU_122 | Spirochaetes    | Leptospirae         | Leptospirales      | Leptospiraceae      | <i>Leptospira</i>           |
| OTU_123 | Proteobacteria  | Betaproteobacteria  | Methylophilales    | Methylophilaceae    | Unclassified                |
| OTU_127 | Bacteroidetes   | Sphingobacteriia    | Sphingobacteriales | Sphingobacteriaceae | Unclassified                |
| OTU_144 | Proteobacteria  | Betaproteobacteria  | Burkholderiales    | Comamonadaceae      | <i>Acidovorax</i>           |
| OTU_150 | Planctomycetes  | Planctomycetia      | Pirellulales       | Pirellulaceae       | Unclassified                |
| OTU_214 | Proteobacteria  | Alphaproteobacteria | Rhizobiales        | Unclassified        | Unclassified                |
| OTU_223 | Proteobacteria  | Alphaproteobacteria | Sphingomonadales   | Sphingomonadaceae   | <i>Novosphingobium</i>      |
| OTU_241 | Actinobacteria  | Actinobacteria      | Actinomycetales    | Microbacteriaceae   | <i>Candidatus Rhodoluna</i> |
| OTU_288 | Proteobacteria  | Alphaproteobacteria | Sphingomonadales   | Sphingomonadaceae   | <i>Novosphingobium</i>      |
| OTU_305 | Verrucomicrobia | Pedosphaerae        | Pedosphaerales     | R4-41B              | Unclassified                |
| OTU_329 | Proteobacteria  | Betaproteobacteria  | Burkholderiales    | Comamonadaceae      | Unclassified                |
| OTU_348 | Actinobacteria  | Actinobacteria      | Actinomycetales    | Unclassified        | Unclassified                |
| OTU_384 | Actinobacteria  | Actinobacteria      | Actinomycetales    | ACK-M1              | Unclassified                |
| OTU_396 | Bacteroidetes   | Flavobacteriia      | Flavobacteriales   | Cryomorphaceae      | <i>Fluviicola</i>           |
| OTU_416 | Proteobacteria  | Betaproteobacteria  | Methylophilales    | Methylophilaceae    | Unclassified                |
| OTU_429 | Actinobacteria  | Actinobacteria      | Actinomycetales    | ACK-M1              | Unclassified                |
| OTU_433 | Proteobacteria  | Betaproteobacteria  | Burkholderiales    | Comamonadaceae      | <i>Limnohabitans</i>        |
| OTU_460 | Actinobacteria  | Actinobacteria      | Actinomycetales    | Mycobacteriaceae    | <i>Mycobacterium</i>        |
| OTU_469 | Bacteroidetes   | Cytophagia          | Cytophagales       | Cytophagaceae       | Unclassified                |
| OTU_471 | Proteobacteria  | Betaproteobacteria  | Burkholderiales    | Comamonadaceae      | <i>Acidovorax</i>           |
| OTU_503 | Bacteroidetes   | Flavobacteriia      | Flavobacteriales   | Flavobacteriaceae   | <i>Flavobacterium</i>       |
| OTU_536 | Proteobacteria  | Alphaproteobacteria | Caulobacterales    | Caulobacteraceae    | <i>Phenyllobacterium</i>    |
| OTU_595 | Proteobacteria  | Alphaproteobacteria | Rickettsiales      | Rickettsiaceae      | <i>Rickettsia</i>           |
| OTU_611 | Proteobacteria  | Betaproteobacteria  | Burkholderiales    | Unclassified        | Unclassified                |
| OTU_671 | Proteobacteria  | Betaproteobacteria  | Methylophilales    | Methylophilaceae    | Unclassified                |
| OTU_703 | Proteobacteria  | Alphaproteobacteria | Rhizobiales        | Unclassified        | Unclassified                |
| OTU_710 | Bacteroidetes   | Flavobacteriia      | Flavobacteriales   | Flavobacteriaceae   | <i>Flavobacterium</i>       |



| OTU ID   | Phylum         | Class               | Order              | Family                 | Genus                    |
|----------|----------------|---------------------|--------------------|------------------------|--------------------------|
| OTU_719  | Actinobacteria | Actinobacteria      | Actinomycetales    | ACK-M1                 | Unclassified             |
| OTU_760  | Bacteroidetes  | Flavobacteriia      | Flavobacteriales   | Flavobacteriaceae      | <i>Flavobacterium</i>    |
| OTU_766  | Proteobacteria | Betaproteobacteria  | Methylophilales    | Methylophilaceae       | Unclassified             |
| OTU_786  | Bacteroidetes  | Saprospirae         | Saprospirales      | Chitinophagaceae       | <i>Sediminibacterium</i> |
| OTU_793  | Proteobacteria | Betaproteobacteria  | Methylophilales    | Methylophilaceae       | Unclassified             |
| OTU_807  | Proteobacteria | Betaproteobacteria  | Burkholderiales    | Oxalobacteraceae       | Unclassified             |
| OTU_881  | Proteobacteria | Betaproteobacteria  | Burkholderiales    | Comamonadaceae         | <i>Diaphorobacter</i>    |
| OTU_980  | Bacteroidetes  | Sphingobacteriia    | Sphingobacteriales | Unclassified           | Unclassified             |
| OTU_1011 | Planctomycetes | Planctomycetia      | Pirellulales       | Pirellulaceae          | Unclassified             |
| OTU_1122 | Actinobacteria | Thermoleophilia     | Gaiellales         | Unclassified           | Unclassified             |
| OTU_1283 | Bacteroidetes  | Sphingobacteriia    | Sphingobacteriales | Unclassified           | Unclassified             |
| OTU_1297 | Proteobacteria | Betaproteobacteria  | Burkholderiales    | Unclassified           | Unclassified             |
| OTU_1350 | Actinobacteria | Actinobacteria      | Actinomycetales    | Unclassified           | Unclassified             |
| OTU_1367 | Bacteroidetes  | Bacteroidia         | Bacteroidales      | Unclassified           | Unclassified             |
| OTU_1426 | Proteobacteria | Betaproteobacteria  | Burkholderiales    | Comamonadaceae         | <i>Rubrivivax</i>        |
| OTU_1527 | OD1            | ZB2                 | Unclassified       | Unclassified           | Unclassified             |
| OTU_1598 | OD1            | ZB2                 | Unclassified       | Unclassified           | Unclassified             |
| OTU_1909 | Acidobacteria  | Solibacteres        | Solibacterales     | Unclassified           | Unclassified             |
| OTU_1959 | Proteobacteria | Betaproteobacteria  | Burkholderiales    | Comamonadaceae         | Unclassified             |
| OTU_1970 | Proteobacteria | Alphaproteobacteria | Rhizobiales        | Unclassified           | Unclassified             |
| OTU_2071 | Bacteroidetes  | Flavobacteriia      | Flavobacteriales   | Cryomorphaceae         | <i>Fluviicola</i>        |
| OTU_2408 | Proteobacteria | Betaproteobacteria  | Burkholderiales    | Oxalobacteraceae       | Unclassified             |
| OTU_2443 | Actinobacteria | Actinobacteria      | Actinomycetales    | ACK-M1                 | Unclassified             |
| OTU_3834 | Proteobacteria | Betaproteobacteria  | Burkholderiales    | Oxalobacteraceae       | <i>Polynucleobacter</i>  |
| OTU_5691 | Proteobacteria | Betaproteobacteria  | Burkholderiales    | Oxalobacteraceae       | <i>Polynucleobacter</i>  |
| OTU_6505 | Proteobacteria | Gammaproteobacteria | Vibrionales        | Pseudoalteromonadaceae | <i>Vibrio</i>            |
| OTU_6704 | Actinobacteria | Actinobacteria      | Actinomycetales    | ACK-M1                 | Unclassified             |

**Supplementary Table 2.** Permutational multivariate analysis of variance (PERMANOVA) showing the gut microbiota differences between zebrafish raised in original environments (Env.) and switched environments.

|                                    | Bray-Curtis |          |
|------------------------------------|-------------|----------|
|                                    | <i>F</i>    | <i>p</i> |
| 12-20 dph                          |             |          |
| Original Env. A vs Switched Env.   | 1.48        | 0.180    |
| Original Env. B vs Switched Env.   | 1.45        | 0.209    |
| Original Env. C vs Switched Env.   | 1.38        | 0.199    |
| 27-42 dph                          |             |          |
| Original Env. A vs Switched Env.   | 1.45        | 0.186    |
| Original Env. B vs Switched Env.   | 0.80        | 0.592    |
| Original Env. C vs Env. changed    | 2.63        | 0.014    |
| 56-98 dph                          |             |          |
| Original Env. A vs Env. changed    | 1.13        | 0.282    |
| Original Env. B vs Env. changed    | 2.06        | 0.068    |
| Original Env. C vs Env. changed    | 2.03        | 0.071    |
| across all stages                  |             |          |
| Original Env. A vs Original Env. B | 1.08        | 0.330    |
| Original Env. A vs Original Env. C | 1.56        | 0.143    |
| Original Env. B vs Original Env. C | 1.32        | 0.239    |
| Original Env. A vs Switched Env.   | 0.65        | 0.640    |
| Original Env. B vs Switched Env.   | 0.65        | 0.666    |
| Original Env. C vs Switched Env.   | 1.41        | 0.197    |

dph: day post-hatching.

**Supplementary Table 3.** Permutational multivariate analysis of variance (PERMANOVA) showing the community differences between gut microbiotas and water microbiotas.

|                                                          | Bray-Curtis |          | Jaccard  |          |
|----------------------------------------------------------|-------------|----------|----------|----------|
|                                                          | <i>F</i>    | <i>p</i> | <i>F</i> | <i>p</i> |
| Hatched in environment A but raised in different tanks   |             |          |          |          |
| Gut 12-20 dph vs Water 12 dph                            | 14.64       | 0.001    | 3.96     | 0.002    |
| Gut 27-42 dph vs Water 27-42 dph                         | 15.38       | 0.001    | 7.07     | 0.001    |
| Gut 56-98 dph vs Water 56-98 dph                         | 15.29       | 0.001    | 5.17     | 0.001    |
| Hatched in environment B but raised in different tanks   |             |          |          |          |
| Gut 12-20 dph vs Water 12 dph                            | 13.40       | 0.001    | 4.53     | 0.001    |
| Gut 27-42 dph vs Water 27-42 dph                         | 18.21       | 0.001    | 6.17     | 0.001    |
| Gut 56-98 dph vs Water 56-98 dph                         | 19.66       | 0.001    | 5.06     | 0.001    |
| Hatched in environment C but raised in different tanks   |             |          |          |          |
| Gut 12-20 dph vs Water 12 dph                            | 19.07       | 0.001    | 3.79     | 0.003    |
| Gut 27-42 dph vs Water 27-42 dph                         | 12.81       | 0.001    | 5.86     | 0.001    |
| Gut 56-98 dph vs Water 56-98 dph                         | 14.80       | 0.001    | 4.47     | 0.001    |
| Hatched from different environments but raised in tank A |             |          |          |          |
| Gut 12-20 dph vs Water 12 dph                            | 10.10       | 0.001    | 3.85     | 0.001    |
| Gut 27-42 dph vs Water 27-42 dph                         | 17.46       | 0.001    | 7.21     | 0.001    |
| Gut 56-98 dph vs Water 56-98 dph                         | 17.87       | 0.001    | 5.57     | 0.001    |
| Hatched from different environments but raised in tank B |             |          |          |          |
| Gut 12-20 dph vs Water 12 dph                            | 37.39       | 0.001    | 4.96     | 0.002    |
| Gut 27-42 dph vs Water 27-42 dph                         | 34.44       | 0.001    | 7.53     | 0.001    |
| Gut 56-98 dph vs Water 56-98 dph                         | 18.99       | 0.001    | 6.58     | 0.001    |
| Hatched from different environments but raised in tank C |             |          |          |          |
| Gut 12-20 dph vs Water 12 dph                            | 15.11       | 0.001    | 4.43     | 0.001    |
| Gut 27-42 dph vs Water 27-42 dph                         | 10.37       | 0.001    | 5.68     | 0.001    |
| Gut 56-98 dph vs Water 56-98 dph                         | 16.29       | 0.001    | 5.25     | 0.001    |
| Across all tanks                                         |             |          |          |          |
| Gut 12-20 dph vs Water 12 dph                            | 31.66       | 0.001    | 8.17     | 0.001    |
| Gut 27-42 dph vs Water 27-42 dph                         | 33.62       | 0.001    | 14.93    | 0.001    |
| Gut 56-98 dph vs Water 56-98 dph                         | 41.72       | 0.001    | 11.73    | 0.001    |

No water sample is available for 20 days post-hatching (dph).

**Supplementary Table 4.** Summary statistics of general linear model (GLM) analysis of alpha diversity versus developmental stage, environment, transition and food.

| Source              | df | Phylogenetic diversity (PD) |                            |       |                                                  |
|---------------------|----|-----------------------------|----------------------------|-------|--------------------------------------------------|
|                     |    | Adj SS                      | Adj MS                     | F     | p                                                |
| Developmental stage | 6  | 6817.00                     | 1136.12<br>$r^2 = 45.91\%$ | 25.75 | <b>&lt; 0.001</b><br>$r^2(\text{adj}) = 44.13\%$ |
| Environment         | 2  | 204.50                      | 102.25<br>$r^2 = 1.38\%$   | 1.30  | 0.275<br>$r^2(\text{adj}) = 0.32\%$              |
| Transition          | 1  | 160.20                      | 160.24<br>$r^2 = 1.08\%$   | 2.04  | 0.155<br>$r^2(\text{adj}) = 0.55\%$              |
| Food                | 1  | 124.60                      | 124.57<br>$r^2 = 0.84\%$   | 1.58  | 0.210<br>$r^2(\text{adj}) = 0.31\%$              |
|                     |    | Richness                    |                            |       |                                                  |
|                     |    | Adj SS                      | Adj MS                     | F     | p                                                |
| Developmental stage | 6  | 4544157                     | 757360<br>$r^2 = 41.39\%$  | 21.42 | <b>&lt; 0.001</b><br>$r^2(\text{adj}) = 39.45\%$ |
| Environment         | 2  | 369338                      | 184669<br>$r^2 = 3.36\%$   | 3.24  | <b>0.041</b><br>$r^2(\text{adj}) = 2.32\%$       |
| Transition          | 1  | 117943                      | 117943<br>$r^2 = 1.07\%$   | 2.03  | 0.156<br>$r^2(\text{adj}) = 0.55\%$              |
| Food                | 1  | 85228                       | 85228<br>$r^2 = 0.78\%$    | 1.42  | 0.228<br>$r^2(\text{adj}) = 0.25\%$              |
|                     |    | Shannon                     |                            |       |                                                  |
|                     |    | Adj SS                      | Adj MS                     | F     | p                                                |
| Developmental stage | 6  | 39.93                       | 6.66<br>$r^2 = 33.43\%$    | 15.23 | <b>&lt; 0.001</b><br>$r^2(\text{adj}) = 31.24\%$ |
| Environment         | 2  | 3.62                        | 1.81<br>$r^2 = 3.03\%$     | 2.91  | 0.057<br>$r^2(\text{adj}) = 1.99\%$              |
| Transition          | 1  | 1.69                        | 1.69<br>$r^2 = 1.42\%$     | 2.69  | 0.103<br>$r^2(\text{adj}) = 0.89\%$              |
| Food                | 1  | 0.08                        | 0.08<br>$r^2 = 0.07\%$     | 0.12  | 0.727<br>$r^2(\text{adj}) = 0.00\%$              |

The  $p$  values < 0.05 in bold.

**Supplementary Table 5.** Hierarchical partitioning of the variance in the alpha diversity associated with four predictors.

|                             | Developmental stage | Environment | Transition   | Food         |
|-----------------------------|---------------------|-------------|--------------|--------------|
| Phylogenetic diversity (PD) |                     |             |              |              |
| Independent                 | 0.152               | 0.002       | 0.011        | 0.020        |
| Joint                       | -0.011              | 2.1E-17     | -5.2E-18     | -0.011       |
|                             | <b>82.4%</b>        | <b>1.2%</b> | <b>5.8%</b>  | <b>10.6%</b> |
| Richness                    |                     |             |              |              |
| Independent                 | 0.117               | 0.007       | 0.011        | 0.015        |
| Joint                       | -0.007              | -2.0E-17    | 1.6E-17      | -0.007       |
|                             | <b>78.5%</b>        | <b>4.5%</b> | <b>7.2%</b>  | <b>9.7%</b>  |
| Shannon                     |                     |             |              |              |
| Independent                 | 0.062               | 0.009       | 0.014        | 0.011        |
| Joint                       | -0.010              | -2.1E-17    | -1.0E-17     | -0.010       |
|                             | <b>64.3%</b>        | <b>9.8%</b> | <b>14.8%</b> | <b>11.1%</b> |

The negative values for joint effects indicate that a variable is acting as a suppressor variable.

**Supplementary Table 6.** Summary statistics for Mantel and partial Mantel tests of correlation between gut microbiota (*M*) and environment (*E*) / transition (*T*) / food (*F*).

| Test type      | Test statistic | Bray-Curtis |          | Jaccard  |          |
|----------------|----------------|-------------|----------|----------|----------|
|                |                | <i>r</i>    | <i>p</i> | <i>r</i> | <i>p</i> |
| Mantel         | $r(ME)$        | 0.02        | 0.014    | 0.12     | < 0.001  |
|                | $r(MT)$        | -0.01       | 0.173    | 0.01     | 0.417    |
|                | $r(MF)$        | 0.21        | < 0.001  | 0.10     | < 0.001  |
| partial Mantel | $r(ME.S)$      | 0.04        | < 0.001  | 0.16     | < 0.001  |
|                | $r(ME.T)$      | 0.02        | 0.031    | 0.11     | < 0.001  |
|                | $r(ME.F)$      | 0.02        | 0.008    | 0.11     | < 0.001  |
|                | $r(MT.S)$      | 0.01        | 0.534    | 0.01     | 0.116    |
|                | $r(MT.E)$      | -0.01       | 0.061    | -0.01    | 0.246    |
|                | $r(MT.F)$      | -0.01       | 0.067    | -0.003   | 0.708    |
|                | $r(MF.S)$      | -0.14       | < 0.001  | -0.16    | < 0.001  |
|                | $r(MF.E)$      | 0.16        | < 0.001  | 0.07     | < 0.001  |
|                | $r(MF.F)$      | 0.17        | < 0.001  | 0.08     | < 0.001  |

The Mantel statistic  $r(AB)$  estimates the correlation between two matrices *A* and *B*. Whereas, the partial Mantel  $r(AB.C)$  statistic estimates the correlation between *A* and *B* whilst controlling for the effects of *C*. The *S* indicates developmental stage.

**Supplementary Table 7.** Bray-Curtis distance-based significance tests of centroid differences between the observed communities and the null model simulations within zebrafish developmental stages.

|                     | Observed similarity | Permutated similarity | Effect size | Deterministic ratio | <i>p</i> |
|---------------------|---------------------|-----------------------|-------------|---------------------|----------|
| Tank A              |                     |                       |             |                     |          |
| 12-20 dph           | 0.397               | 0.024                 | 2.583       | 0.887               | < 0.001  |
| 27-42 dph           | 0.483               | 0.028                 | 2.843       | 0.933               | < 0.001  |
| 56-98 dph           | 0.560               | 0.022                 | 3.355       | 0.960               | < 0.001  |
| Tank B              |                     |                       |             |                     |          |
| 12-20 dph           | 0.655               | 0.017                 | 3.656       | 0.972               | < 0.001  |
| 27-42 dph           | 0.513               | 0.025                 | 2.990       | 0.946               | < 0.001  |
| 56-98 dph           | 0.531               | 0.036                 | 2.733       | 0.927               | < 0.001  |
| Tank C              |                     |                       |             |                     |          |
| 12-20 dph           | 0.506               | 0.015                 | 3.356       | 0.951               | < 0.001  |
| 27-42 dph           | 0.316               | 0.024                 | 2.533       | 0.907               | < 0.001  |
| 56-98 dph           | 0.535               | 0.023                 | 3.175       | 0.953               | < 0.001  |
| Three tanks overall |                     |                       |             |                     |          |
| 12-20 dph           | 0.507               | 0.017                 | 3.248       | 0.941               | < 0.001  |
| 27-42 dph           | 0.394               | 0.024                 | 2.767       | 0.927               | < 0.001  |
| 56-98 dph           | 0.517               | 0.023                 | 3.192       | 0.952               | < 0.001  |

The *p* values are from the *t*-test on observed and permutated similarity. dph: day post-hatching.
